# Supplementary material for: Tuning facial–meridional isomerisation in monometallic nine-co-ordinate lanthanide complexes with unsymmetrical tridentate ligands
Source: Royal Society of Chemistry journal article supplement (doi:10.1039/b316035a), 2004-01-01
Supplement: b316035a.pdf [file b316035a.pdf]

**Tuning facial-meridional isomerisation in monometallic nine-co-ordinate lanthanide complexes with unsymmetrical tridentate ligands.**

---

Thierry Le Borgne, Peter Altmann, Nicolas André, Jean-Claude G. Bünzli, \* Gérald Bernardinelli,  
Pierre-Yves Morgantini, Jacques Weber and Claude Piguet \*

**Supporting Information**

(5 Pages)

Table S1 Lifetimes ( $\tau$ ) of the ligand-centred  $^3\pi\pi^*$ , and Eu( $^5D_0$ ) excited level in  $[\text{Eu}(\mathbf{L2})_3]^{3+}$  and Tb( $^5D_4$ ) in  $[\text{Tb}(\mathbf{L2})_3]^{3+}$  in acetonitrile.

| Compound                          | Conc / mol·dm <sup>-3</sup> | T /K | $\tilde{\nu}_{\text{ex}} / \text{cm}^{-1}$ | $\tau/\text{ms}$ |
|-----------------------------------|-----------------------------|------|--------------------------------------------|------------------|
| <b>L2</b>                         | 10 <sup>-5</sup>            | 77   | 31940                                      | ≥ 100            |
| $[\text{Lu}(\mathbf{L2})_3]^{3+}$ | 6·10 <sup>-4</sup>          | 77   | 39525                                      | 130(15)          |
| $[\text{Eu}(\mathbf{L2})_3]^{3+}$ | 8·10 <sup>-4</sup>          | 295  | 37040                                      | 2.25(2)          |
| $[\text{Eu}(\mathbf{L2})_3]^{3+}$ | 8·10 <sup>-4</sup>          | 77   | 39060                                      | 1.86(7)          |
| $[\text{Tb}(\mathbf{L2})_3]^{3+}$ | 8·10 <sup>-4</sup>          | 295  | 26109                                      | 0.029(1)         |
| $[\text{Tb}(\mathbf{L2})_3]^{3+}$ | 8·10 <sup>-4</sup>          | 77   | 39215                                      | 1.22(4)          |

Table S2 Elemental analyses for the  $[\text{Ln}(\mathbf{L2})_3](\text{ClO}_4)_3 \cdot x\text{H}_2\text{O}$  (Ln = Eu,  $x = 4$ : **1**; Ln = Tb,  $x = 5.5$ : **2**; Ln = Lu,  $x = 4$ : **3**) and  $[\text{Ln}(\mathbf{L4})_3](\text{CF}_3\text{SO}_3)_3 \cdot x\text{C}_7\text{H}_{15}$  (Ln = Eu,  $x = 0$ : **4**; Ln = Lu,  $x = 0.4$ : **5**). Calculated values are given in parentheses.

| Compound                                                                                             | % C           | % H         | % N           |
|------------------------------------------------------------------------------------------------------|---------------|-------------|---------------|
| $[\text{Eu}(\mathbf{L2})_3](\text{ClO}_4)_3 \cdot 4\text{H}_2\text{O}$ ( <b>1</b> )                  | 46.05 (45.96) | 4.79 (5.01) | 11.20 (11.28) |
| $[\text{Tb}(\mathbf{L2})_3](\text{ClO}_4)_3 \cdot 5.5\text{H}_2\text{O}$ ( <b>2</b> )                | 44.82 (44.94) | 4.59 (5.09) | 10.69 (11.03) |
| $[\text{Lu}(\mathbf{L2})_3](\text{ClO}_4)_3 \cdot 4\text{H}_2\text{O}$ ( <b>3</b> )                  | 45.30 (45.26) | 4.68 (4.93) | 11.01 (11.11) |
| $[\text{Eu}(\mathbf{L4})_3](\text{CF}_3\text{SO}_3)_3$ ( <b>4</b> )                                  | 46.55 (46.60) | 5.05 (4.62) | 9.79 (9.79)   |
| $[\text{Lu}(\mathbf{L4})_3](\text{CF}_3\text{SO}_3)_3 \cdot 0.4\text{C}_7\text{H}_{15}$ ( <b>5</b> ) | 46.93 (46.97) | 4.83 (5.08) | 9.53 (9.93)   |

Table S3 Selected structural data for the lanthanide coordination spheres in [Eu(L1)<sub>2</sub>(CF<sub>3</sub>SO<sub>3</sub>)<sub>2</sub>(H<sub>2</sub>O)](CF<sub>3</sub>SO<sub>3</sub>)(C<sub>3</sub>H<sub>5</sub>N)<sub>2</sub>(H<sub>2</sub>O) (**6**) and [Eu(L4)<sub>2</sub>(CF<sub>3</sub>SO<sub>3</sub>)<sub>2</sub>(H<sub>2</sub>O)](CF<sub>3</sub>SO<sub>3</sub>)(THF)<sub>1.5</sub> (**7**) analysed as tricapped trigonal prims TTP).

|                                                  |          | Angles $\phi^a / ^\circ$ |                          |
|--------------------------------------------------|----------|--------------------------|--------------------------|
| Compd                                            | <b>6</b> | <b>7</b>                 | Perfect TTP <sup>b</sup> |
| R <sup>1</sup> -Eu-R <sup>2</sup>                | 170.9    | 170.7                    | 180                      |
| Angles $\theta_t^a / ^\circ$ (distal tetrapodes) |          |                          |                          |
| Compd                                            | <b>6</b> | <b>7</b>                 | Perfect TTP <sup>b</sup> |
| R <sup>1</sup> -Eu-N2b                           | 45.0     | 44.7                     | $\alpha$                 |
| R <sup>1</sup> -Eu-O1c                           | 50.3     | 52.4                     | $\alpha$                 |
| R <sup>1</sup> -Eu-O1a                           | 45.3     | 43.6                     | $\alpha$                 |
| R <sup>2</sup> -Eu-N2a                           | 48.6     | 46.5                     | $\alpha$                 |
| R <sup>2</sup> -Eu-O1d                           | 44.0     | 42.8                     | $\alpha$                 |
| R <sup>2</sup> -Eu-O1b                           | 43.9     | 44.0                     | $\alpha$                 |
| Angles $\omega_{ij}^a / ^\circ$                  |          |                          |                          |
| Compd                                            | <b>6</b> | <b>7</b>                 | Perfect TTP <sup>b</sup> |
| Proj[N2b]-Eu-Proj[O1c] <sup>c</sup>              | 133.0    | 135.0                    | 120                      |
| Proj[O1c]-Eu-Proj[O1a]                           | 115.1    | 116.8                    | 120                      |
| Proj[O1a]-Eu-Proj[N2b]                           | 111.9    | 108.2                    | 120                      |
| Proj[N1b]-Eu-Proj[O1w]                           | 117.3    | 115.9                    | 120                      |
| Proj[O1w]-Eu-Proj[N1a]                           | 130.0    | 132.0                    | 120                      |
| Proj[N1a]-Eu-Proj[N1b]                           | 112.8    | 112.0                    | 120                      |
| Proj[O1d]-Eu-Proj[N2a]                           | 133.3    | 134.5                    | 120                      |
| Proj[N2a]-Eu-Proj[O1b]                           | 117.5    | 113.5                    | 120                      |
| Proj[O1b]-Eu-Proj[O1d]                           | 109.2    | 111.9                    | 120                      |
| Proj[O1a]-Eu-Proj[O1b]                           | 11.5     | 9.2                      | 0                        |
| Proj[N2b]-Eu-Proj[O1d]                           | 8.8      | 12.8                     | 0                        |
| Proj[O1c]-Eu-Proj[N2a]                           | 9.1      | 12.4                     | 0                        |
| Proj[O1a]-Eu-Proj[O1w]                           | 179.0    | 177.1                    | 180                      |
| Proj[N2b]-Eu-Proj[N1a]                           | 162.9    | 159.1                    | 180                      |
| Proj[O1c]-Eu-Proj[N1b]                           | 176.8    | 178.0                    | 180                      |
| Proj[N1a]-Eu-Proj[O1d]                           | 171.7    | 171.9                    | 180                      |

|                        |       |       |     |
|------------------------|-------|-------|-----|
| Proj[N1b]-Eu-Proj[N2a] | 167.7 | 165.6 | 180 |
| Proj[O1w]-Eu-Proj[O1b] | 167.5 | 168.1 | 180 |

<sup>a</sup> For the definition of  $\phi$ ,  $\theta_i$  and  $\omega_{ij}$ , see the scheme below. The error in the angles is typically  $0.5^\circ$ . <sup>b</sup> TTP = tricapped trigonal prism. <sup>c</sup> Proj[ $O_i$ ] and Proj[ $N_i$ ] are the projections of  $O_i$  and respectively  $N_i$  along the  $R^2$ - $R^1$  direction onto a perpendicular plane passing through the lanthanide atom.  $R^1 = \text{Eu-N2b} + \text{Eu-O1c} + \text{Eu-O1a}$  and  $R^2 = \text{Eu-N2a} + \text{Eu-O1b} + \text{Eu-O1d}$ .

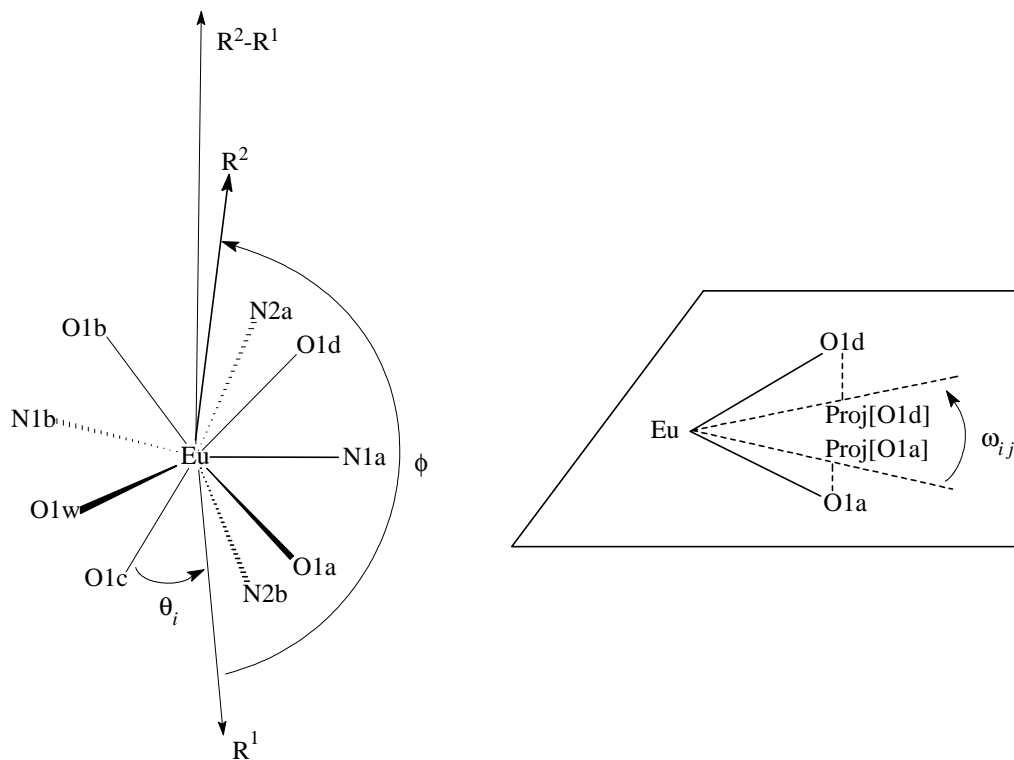

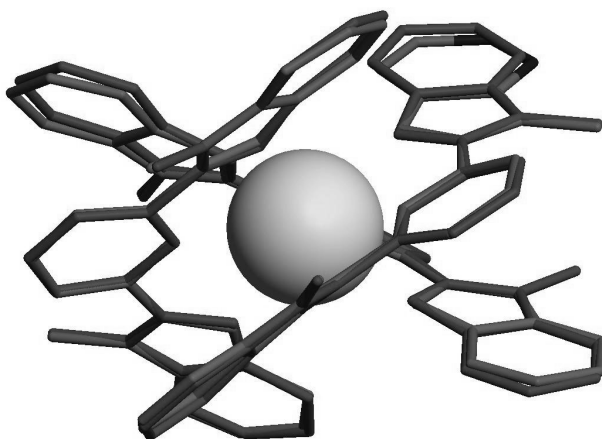

Figure S1 Perspective view of the optimized superimposition of the two molecular structures of  $[\text{Eu}(\text{L5})_3]^{3+}$  obtained by X-ray diffraction in the solid state (in blue) and by MM simulation in the gas-phase (in red) with the parameters reported by Van Veggel and Reinhoudt.<sup>31</sup>

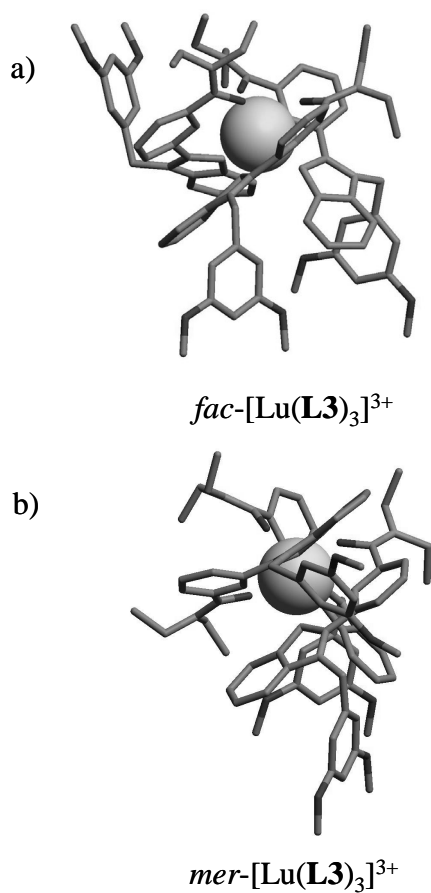

Figure S2 Perspective views of the molecular structures of the two cations a)  $\text{fac-}[\text{Lu}(\text{L3})_3]^{3+}$  and b)  $\text{mer-}[\text{Lu}(\text{L3})_3]^{3+}$  obtained by molecular mechanic in the gas-phase.

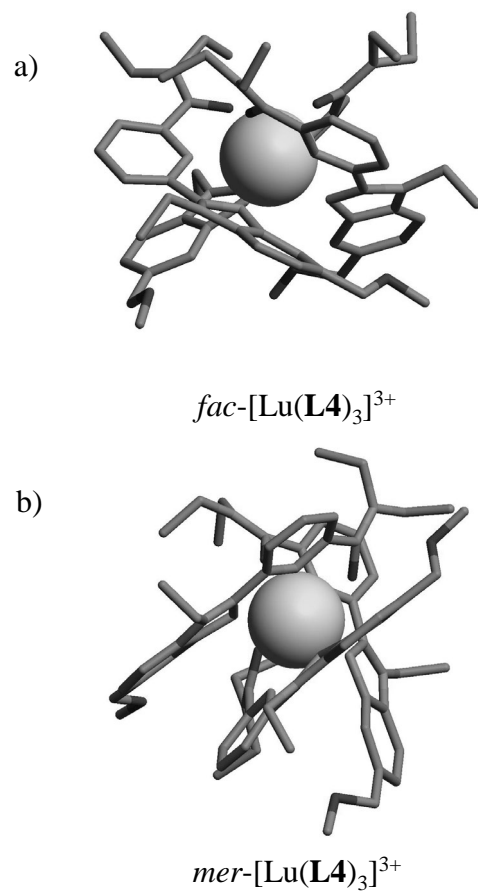

Figure S3 Perspective views of the molecular structures of the two cations a) *fac*-[Lu(**L4**)<sub>3</sub>]<sup>3+</sup> and b) *mer*-[Lu(**L4**)<sub>3</sub>]<sup>3+</sup> obtained by molecular mechanic in the gas-phase.
